# Supplementary material
Source: Royal Society of Chemistry journal article supplement (doi:10.1039/d6nj00104a)
Supplement: d6nj00104a1.pdf [file d6nj00104a1.pdf]

## Supporting Information

### Nanostructured Fe<sub>2</sub>O<sub>3</sub>/SnO<sub>x</sub> Heterojunction Photocatalyst Fabricated by Co-Precipitation and Spin Coating for Efficient Photoelectrochemical Wastewater Treatment

Narendra Pardhi<sup>1</sup>, Hemant Tarkas<sup>1,2</sup>, Dhruv Sharma<sup>3</sup>, Priti Vairale<sup>4</sup>, Sandesh Jadkar<sup>1,\*</sup>, Shashikant  
P. Patole<sup>5,\*</sup>, Habib Pathan<sup>1,\*</sup>

<sup>1</sup>Department of Physics, Savitribai Phule Pune University, Pune, 411007 (India)

<sup>1,2</sup>Department of Applied Sciences and Humanities (Physics), R. C. Patel Institute of Technology, Shirpur  
425 405 (India)

<sup>3</sup>Anant National University, Anant School of Climate Action, Sanskardham Campus, Ahmedabad 382115  
(India)

<sup>4</sup>Center for Energy Studies, Savitribai Phule Pune University, Pune 411 007 (India)

<sup>5</sup>Department of Physics, Khalifa University of Science and Technology, Abu Dhabi 127788 (UAE)

\*Corresponding author:

---

[sandesh@physics.unipune.ac.in](mailto:sandesh@physics.unipune.ac.in) (S. Jadkar)

[shashikant.patole@ku.ac.ae](mailto:shashikant.patole@ku.ac.ae) (S. Patole)

[pathan@physics.unipune.ac.in](mailto:pathan@physics.unipune.ac.in) (H. Pathan)

## 1: Variation of pH as a function of $\text{NH}_4\text{OH}$

The initial pH of the precursor solution was about 1, indicating a highly acidic medium. Ammonium hydroxide ( $\text{NH}_4\text{OH}$ ) was added dropwise under continuous magnetic stirring (1500 rpm) at room temperature to gradually increase the pH. Slow addition of  $\text{NH}_4\text{OH}$  helped to avoid local supersaturation and allowed controlled precipitation. The pH was monitored using pH indicator paper, and  $\text{NH}_4\text{OH}$  was added until the pH reached  $\sim 10$ . At this stage, iron hydroxide precipitated. **Figure S1** shows the variation of pH as a function of the volume of  $\text{NH}_4\text{OH}$  introduced during the co-precipitation production of  $\text{Fe}_2\text{O}_3$  nanoparticles.

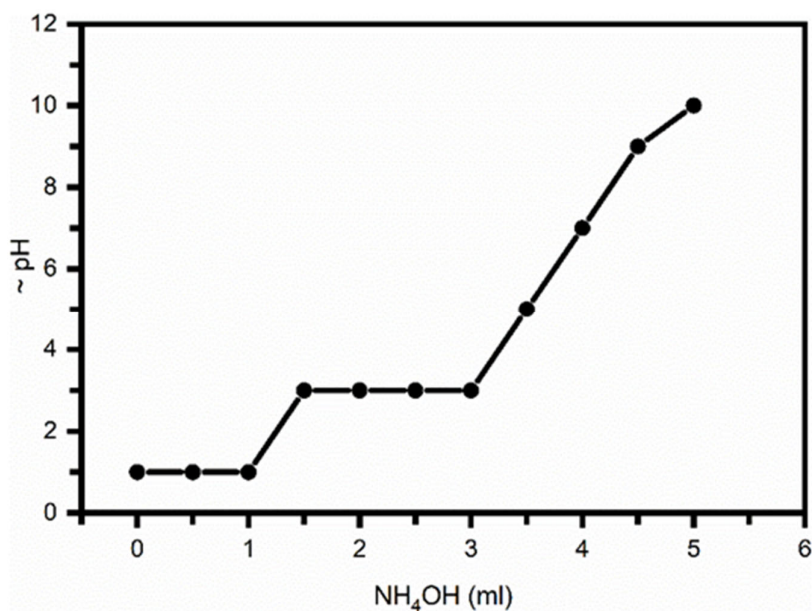

**Figure S1:** pH variation in the solution in relation to the volume of  $\text{NH}_4\text{OH}$  introduced during the co-precipitation production of  $\text{Fe}_2\text{O}_3$  nanoparticles. Using pH indicator paper, the pH was monitored as  $\text{NH}_4\text{OH}$  was gradually added, continuously stirred (at 1500 rpm), until the solution reached pH  $\sim 10$ , at which point iron hydroxide precipitation occurred.

## 2: SEM analysis of $\text{Fe}_2\text{O}_3$ nanoparticles

A precursor concentration of 0.5 M was selected to ensure sufficient nucleation and reproducible synthesis of  $\text{Fe}_2\text{O}_3$  nanoparticles via co-precipitation. **Figure S2** shows the SEM micrograph of as-synthesized  $\text{Fe}_2\text{O}_3$  nanoparticles at 0.5 M concentration of  $\text{FeCl}_2 \cdot 6\text{H}_2\text{O}$  and the corresponding particle size distribution histogram. The chosen concentration provided adequate supersaturation for nucleation and a good yield of  $\text{Fe}_2\text{O}_3$  nanoparticles for subsequent incorporation into  $\text{SnO}_x$  thin films.

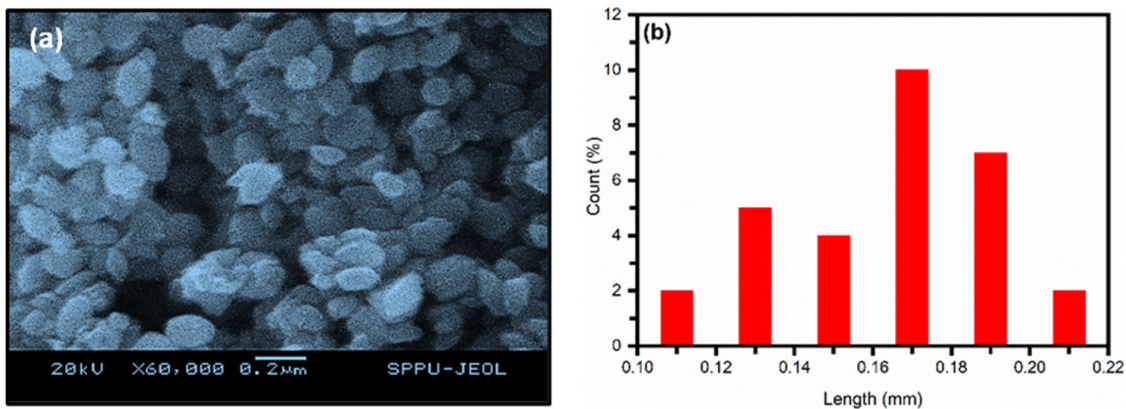

Figure S2: (a) Synthesized SEM micrograph of  $\text{Fe}_2\text{O}_3$  nanoparticles, (b) Particle size distribution histogram.

### 3: Williamson-Hall (W-H) plots

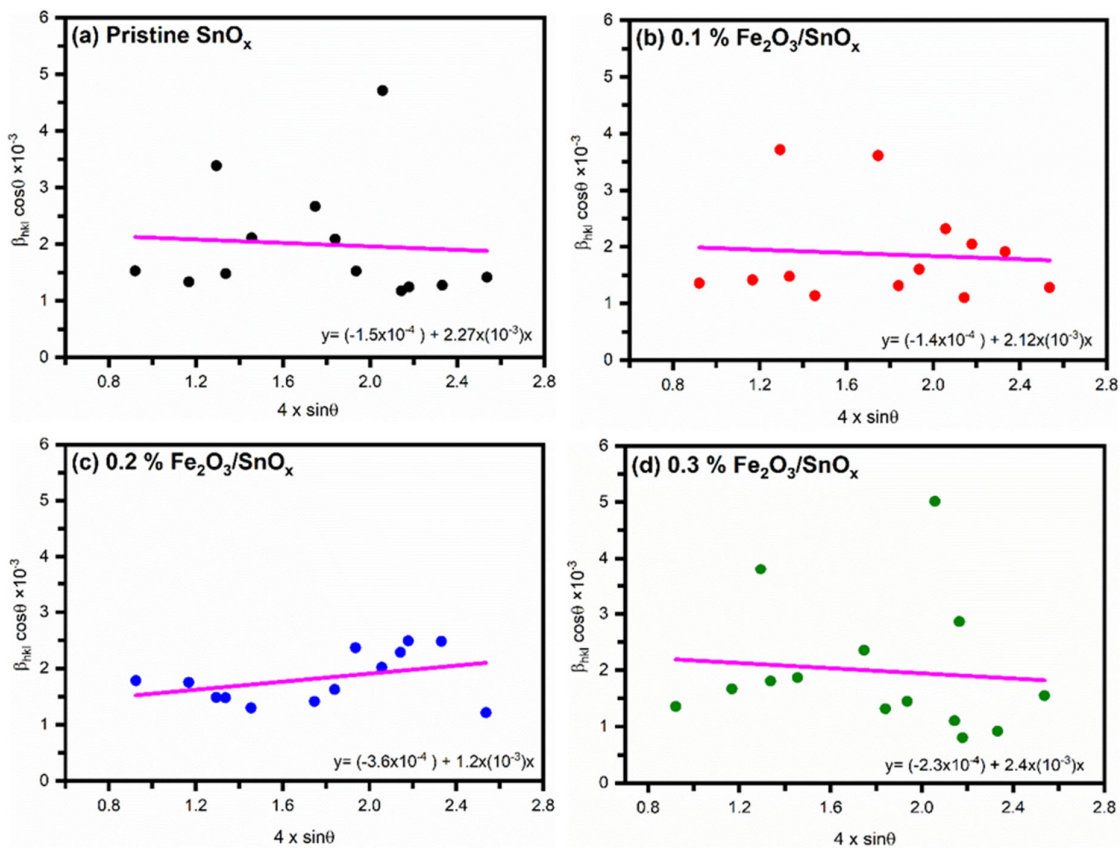

Figure S3: Williamson-Hall (W-H) plots (a) Pristine- $\text{SnO}_x$ , (b) 0.1%  $\text{Fe}_2\text{O}_3/\text{SnO}_x$ , (c) 0.2%  $\text{Fe}_2\text{O}_3/\text{SnO}_x$ , and (d) 0.3%  $\text{Fe}_2\text{O}_3/\text{SnO}_x$  heterojunction thin films.

#### 4: Calculations of the relative concentration of oxygen vacancies

The calculated values of the relative concentration of oxygen vacancies in pristine SnO<sub>x</sub> and 0.1-0.3 % Fe<sub>2</sub>O<sub>3</sub>/SnO<sub>x</sub> samples.

**Table T1:** The relative oxygen vacancy concentration was estimated from the ratio of defect oxygen to the total lattice and defect oxygen peak areas.

| Sample                                                 | Lattice O area | Defect O area | Oxygen Vacancy (%) |
|--------------------------------------------------------|----------------|---------------|--------------------|
| SnO <sub>x</sub>                                       | 29422          | 9710          | 24.81              |
| 0.1 % Fe <sub>2</sub> O <sub>3</sub> /SnO <sub>x</sub> | 10200          | 4373          | 30.01              |
| 0.2 % Fe <sub>2</sub> O <sub>3</sub> /SnO <sub>x</sub> | 10129          | 6129          | 37.70              |
| 0.3 % Fe <sub>2</sub> O <sub>3</sub> /SnO <sub>x</sub> | 7590           | 2400          | 24.02              |

#### 5: Thickness Measurements

The thickness of the photoelectrode films was measured using cross-sectional SEM analysis, as shown in **Figure S4**. The pristine SnO<sub>x</sub> film is ~ 1.4 μm thick. The Fe<sub>2</sub>O<sub>3</sub>-mixed SnO<sub>x</sub> films showed thicknesses of ~ 1.6 μm, 1.7 μm, and 1.3 μm, respectively.

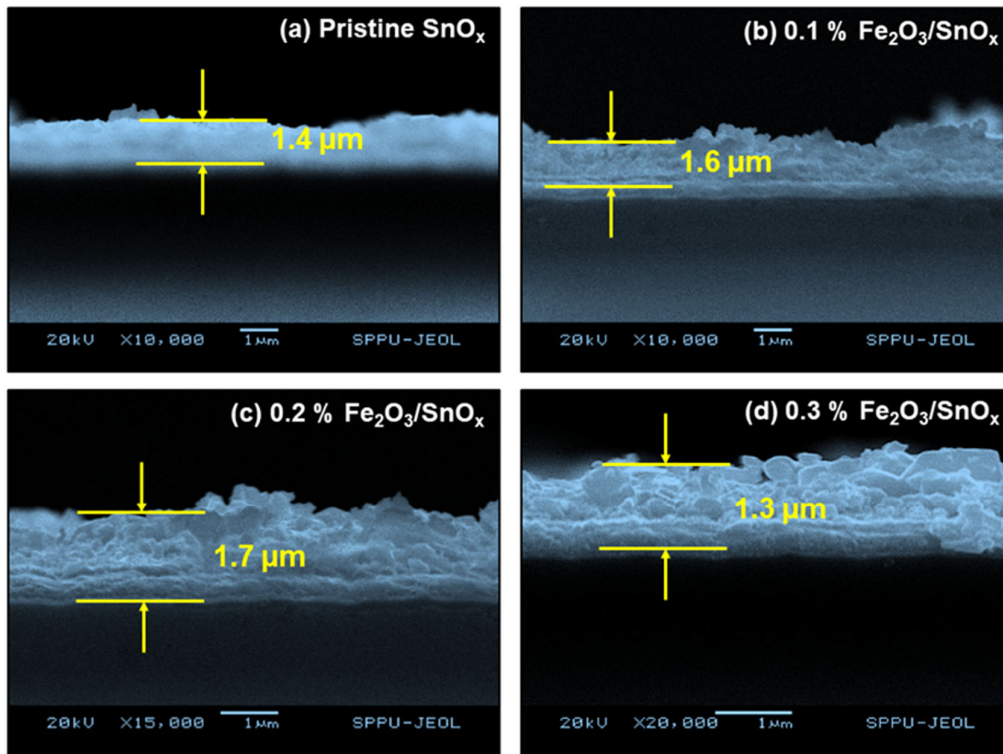

**Figure S4:** Cross-sectional SEM micrographs of (a) Pristine-SnO<sub>x</sub>, (b) 0.1 % Fe<sub>2</sub>O<sub>3</sub>/SnO<sub>x</sub>, (c) 0.2 % Fe<sub>2</sub>O<sub>3</sub>/SnO<sub>x</sub>, and (d) 0.3 % Fe<sub>2</sub>O<sub>3</sub>/SnO<sub>x</sub> for thickness measurement.

## 6: Scanning Electron Microscopy Elemental Mapping

(a) Pristine-SnOx

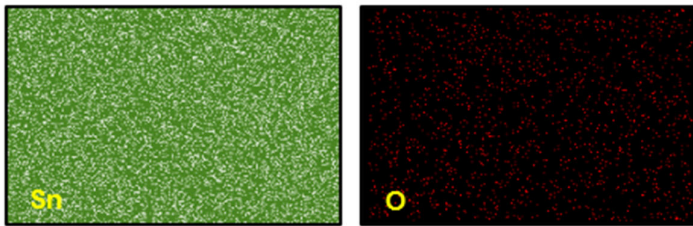

(b) 1 wt. % of Fe<sub>2</sub>O<sub>3</sub> concentration

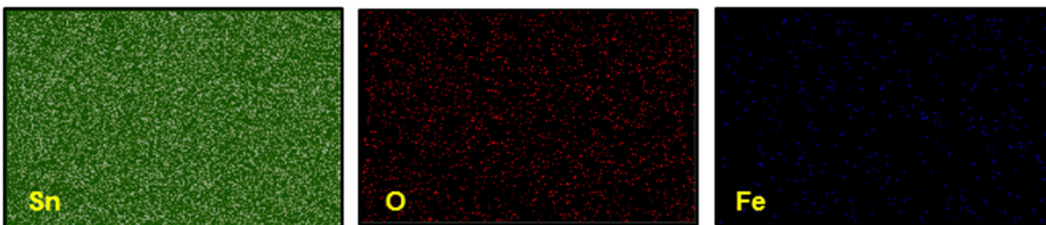

(c) 2 wt. % of Fe<sub>2</sub>O<sub>3</sub> concentration

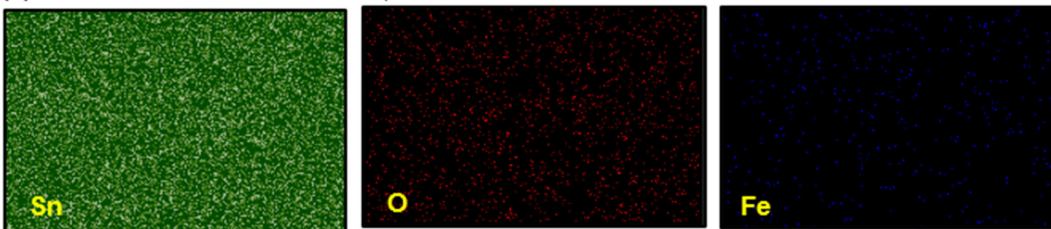

(d) 3 wt. % of Fe<sub>2</sub>O<sub>3</sub> concentration

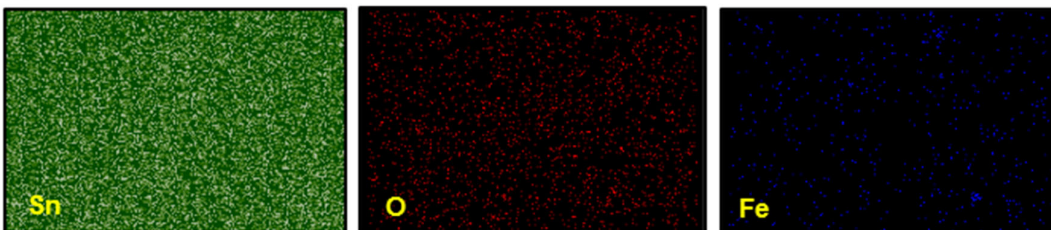

**Figure S5:** Elemental mapping of the Pristine-SnOx and Fe<sub>2</sub>O<sub>3</sub>/SnOx heterojunction thin films with different wt. % of Fe<sub>2</sub>O<sub>3</sub> concentrations

## 7: Angle of Contact Measurements

**Figures S6(a)-S6(d)** show the contact angle measurement image for Pristine-SnOx and Fe<sub>2</sub>O<sub>3</sub>/SnOx heterojunction thin films with different wt. % of Fe<sub>2</sub>O<sub>3</sub> concentrations.

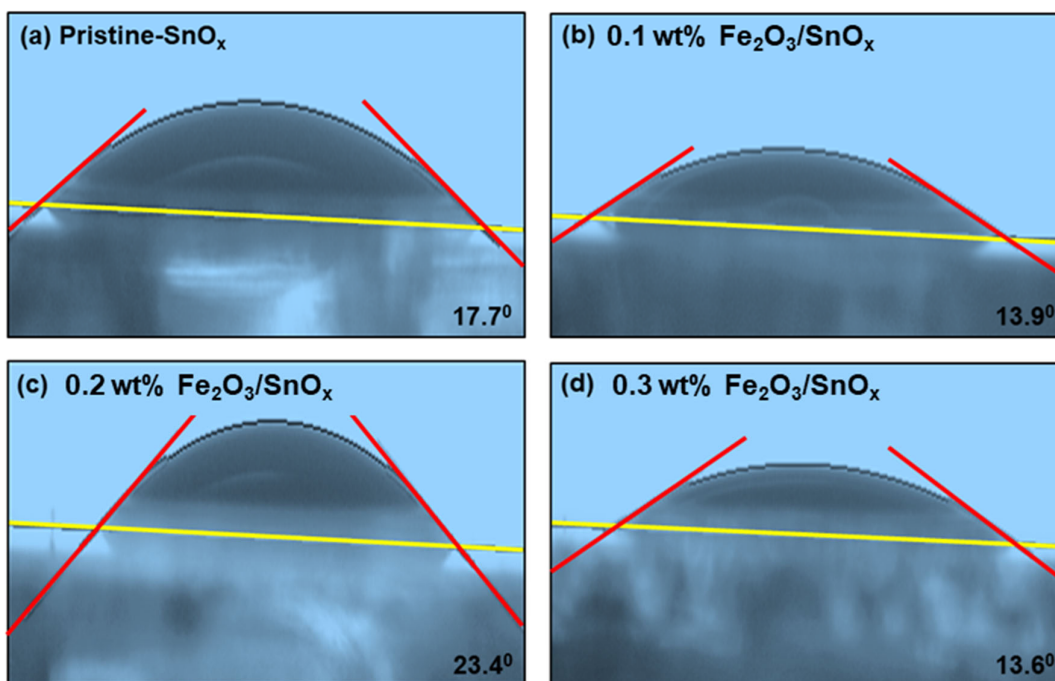

**Figure S6:** Contact angle measurement of (a) SnO<sub>x</sub>, (b) 0.1 wt % Fe<sub>2</sub>O<sub>3</sub>/SnO<sub>x</sub>, (c) 0.2 wt % Fe<sub>2</sub>O<sub>3</sub>/SnO<sub>x</sub>, and (d) 0.3 % Fe<sub>2</sub>O<sub>3</sub>/SnO<sub>x</sub> heterojunctions.

### 8: Chronoamperometric Photocurrent Stability Test

The Chronoamperometric photocurrent stability of the optimized 0.2 % Fe<sub>2</sub>O<sub>3</sub>/SnO<sub>x</sub> photoelectrode measured for 8000 s under continuous illumination is shown in **Figure S7**.

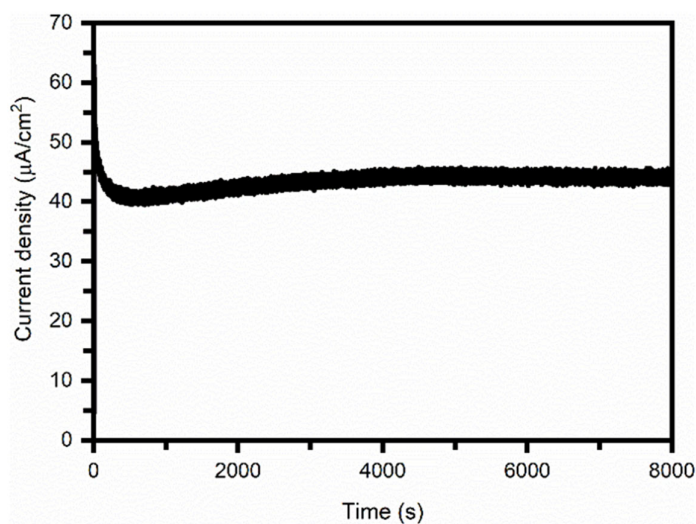

**Figure S7:** Chronoamperometric photocurrent stability of the 0.2% Fe<sub>2</sub>O<sub>3</sub>/SnO<sub>x</sub> photoelectrode measured for 8000 s under continuous illumination in 1 M Na<sub>2</sub>SO<sub>4</sub> electrolyte at an applied bias of 0.5 V (vs. SCE). The light intensity was 100 mW/cm<sup>2</sup>, calibrated using a conventional silicon photodetector, with a Pt electrode used as the counter electrode.

### 9: SEM and EDS Analysis after 8000 s

The surface morphology and compositional analysis of the optimized 0.2 %  $\text{Fe}_2\text{O}_3/\text{SnO}_x$  photoelectrode, measured after 8000 s of continuous illumination, are shown in **Figure S8**.

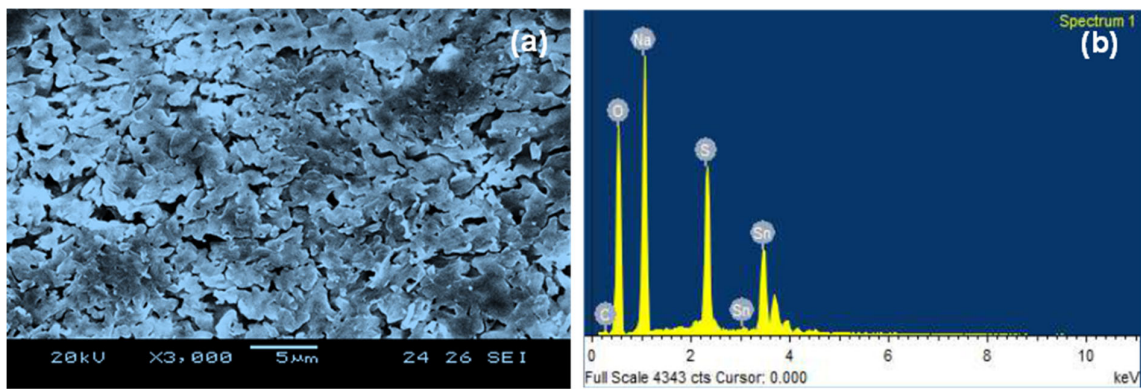

**Figure S8:** (a) After an 8000-second stability test, a SEM image of the 0.2 %  $\text{Fe}_2\text{O}_3/\text{SnO}_x$  thin film revealed a compact and granular morphology. (b) The EDS spectrum shows good compositional stability after extended operation and confirms the presence of Sn, O, and Fe elements, together with Na and S signals coming from the  $\text{Na}_2\text{SO}_4$  electrolyte.
